# Supplementary material for: Comprehensive Analysis of the Expression Profiles of Long Non-Coding RNAs with Associated ceRNA Network Involved in the Colon Cancer Staging and Progression
Source: PubMed Central journal article supplement (PMC6858342; doi:10.1038/s41598-019-52883-2), 2019-11-15
Supplement: 41598_2019_52883_MOESM1_ESM.pdf [file 41598_2019_52883_MOESM1_ESM.pdf]

**Comprehensive Analysis of the Expression Profiles of Long Non-Coding RNAs  
with Associated ceRNA Network Involved in the Colon Cancer Staging and  
Progression**

Meini Wu<sup>1#</sup>, Wenliang Li<sup>2#</sup>, Fengchang Huang<sup>2</sup>, Jing Sun<sup>1</sup>, Kang ping Li<sup>2</sup>, Jiandong Shi<sup>1</sup>, Jingyu Yang<sup>2</sup>, Jianfang Li<sup>1</sup>, Yanhan Li<sup>1</sup>, Ningzhu Hu<sup>1</sup>, YunZhang Hu<sup>1\*</sup>

<sup>1</sup>Department of vaccinology, Institute of Medical Biology, Chinese Academy of Medical Sciences and Peking Union Medical College, Kunming, 650118 China;

<sup>2</sup>Department of Surgical Oncology, First Affiliated Hospital of Kunming Medical University, Kunming, China;

#Equal contributors

\*Corresponding author: Dr. Yunzhang Hu

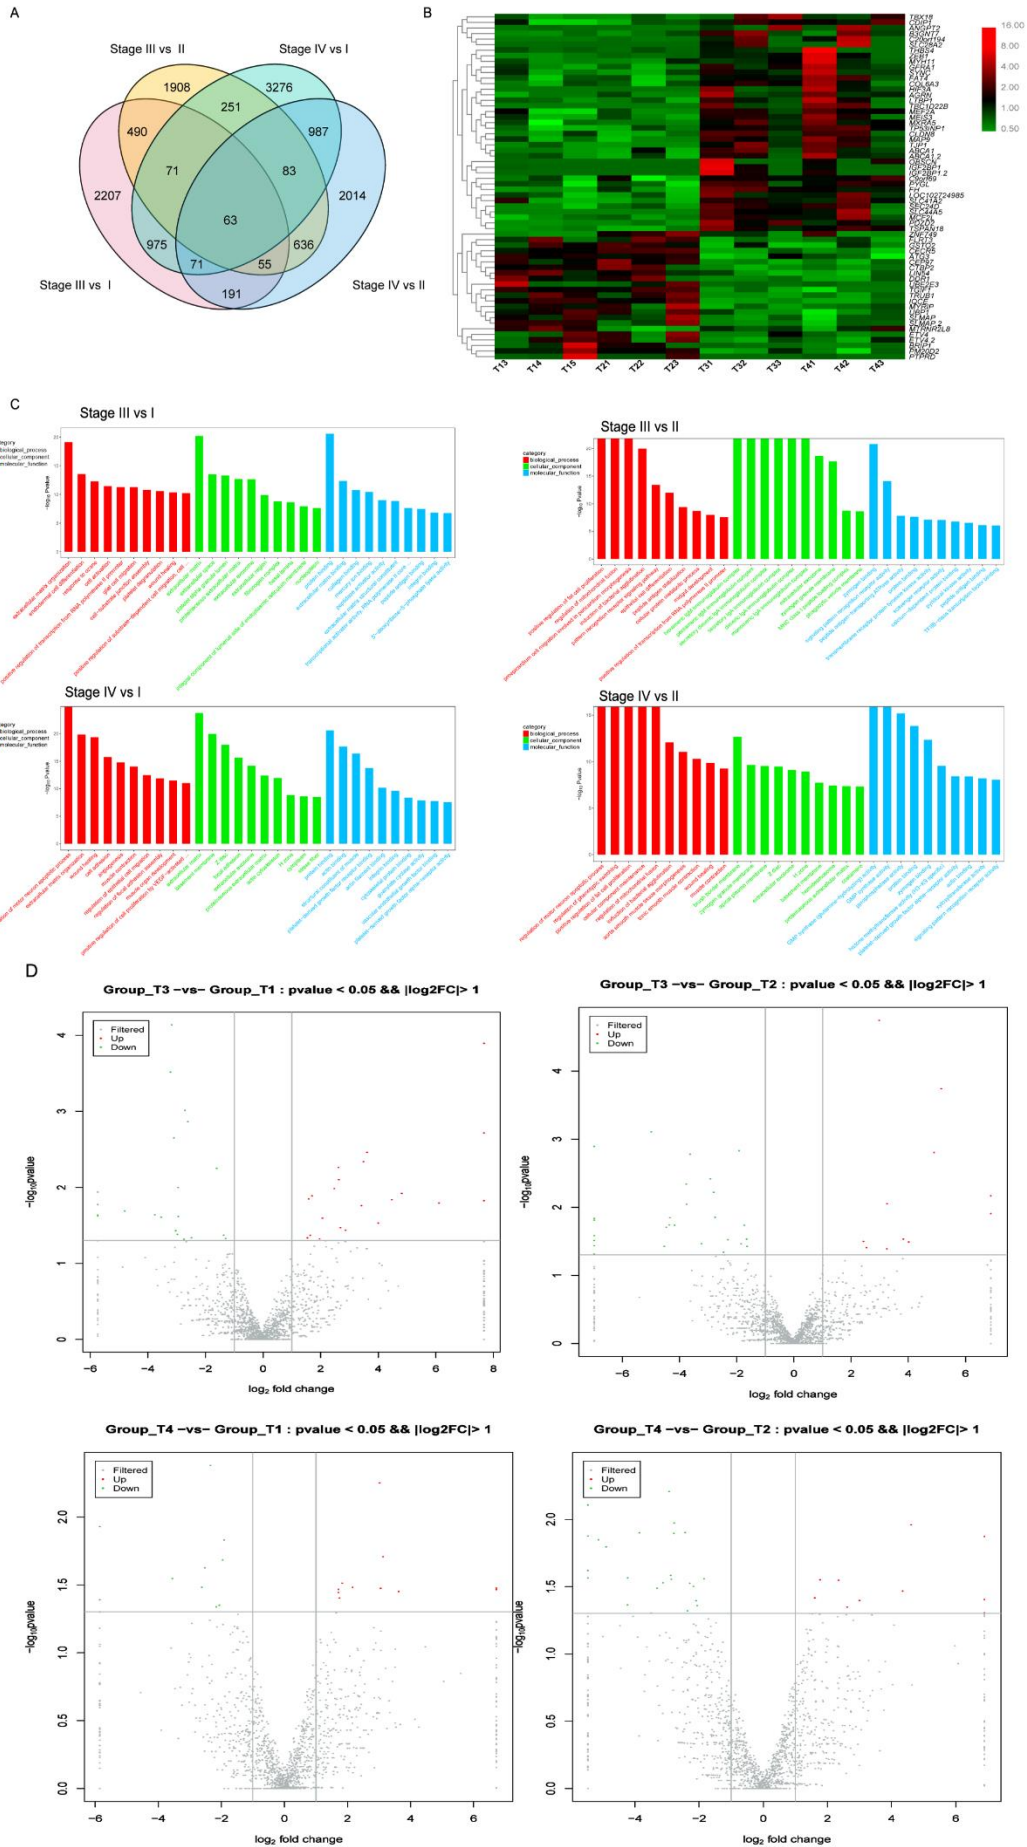

**Supplement 1** Differentially expressed (DE) mRNAs and miRNAs between the stage III/IV tumor tissue and stage I/II tumor tissue. (A) Venn diagram analysis of DEmRNAs at stage III vs stage I, stage III vs stage II, stage IV vs stage I, and stage IV vs stage II of CC (B) Heatmaps of DEmRNAs in stage III/IV tumor. (C) Gene Ontology analysis of DEmRNAs. Red rectangle represents biological process (BP), green rectangle represents cellular component and blue rectangle represents molecular function (MF). (D) Volcano plot of DE miRNAs at stage III vs stage I, stage III vs stage II, stage IV vs stage I, and stage IV vs stage II of CC.

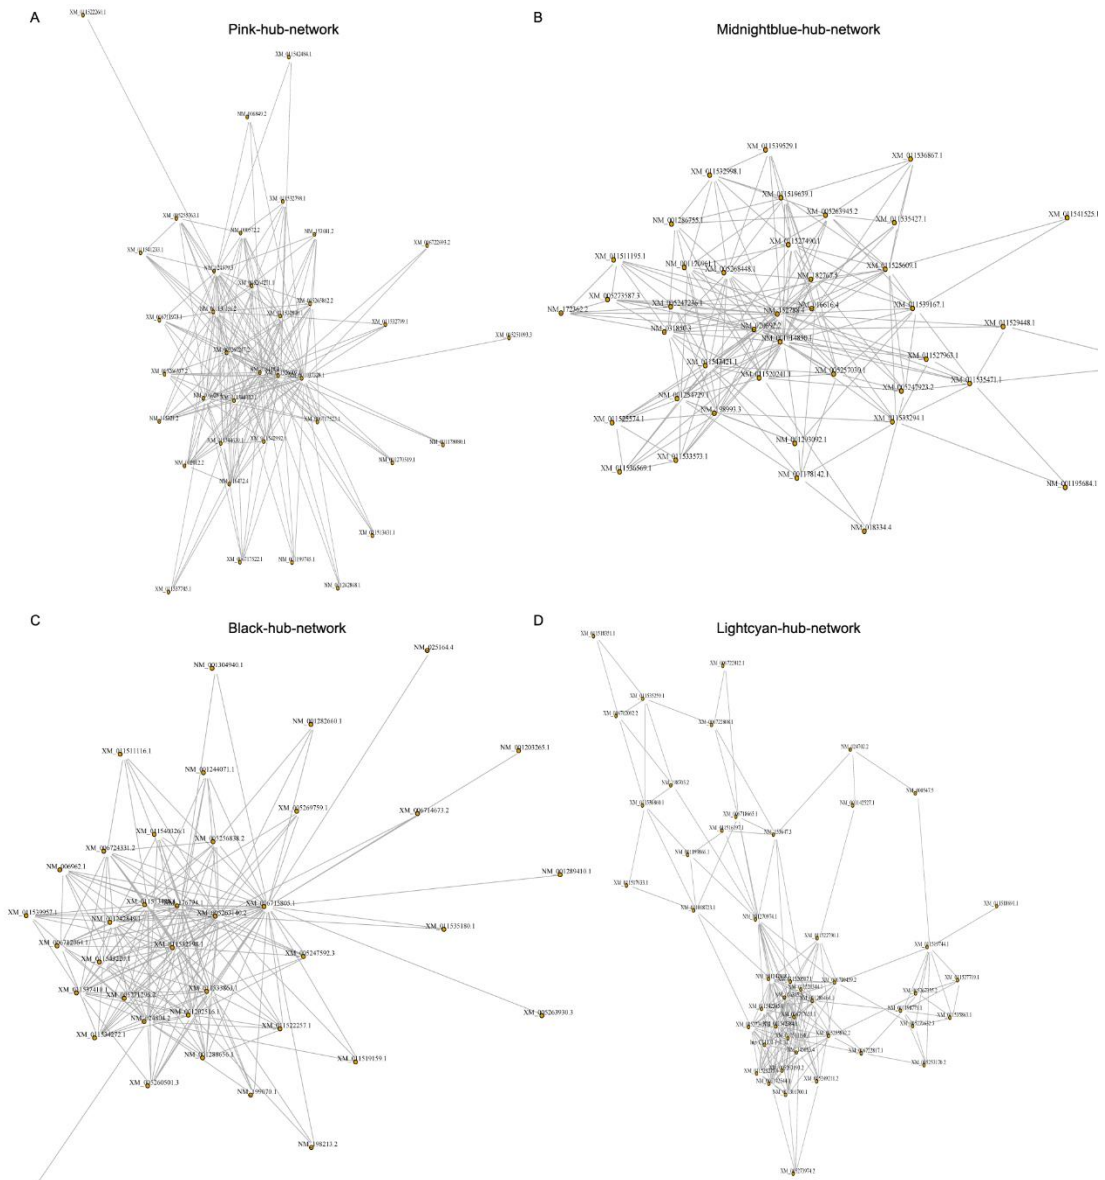

**Supplement 2** Module core gene analysis of model pink, midnightblue, black and lightcyan.

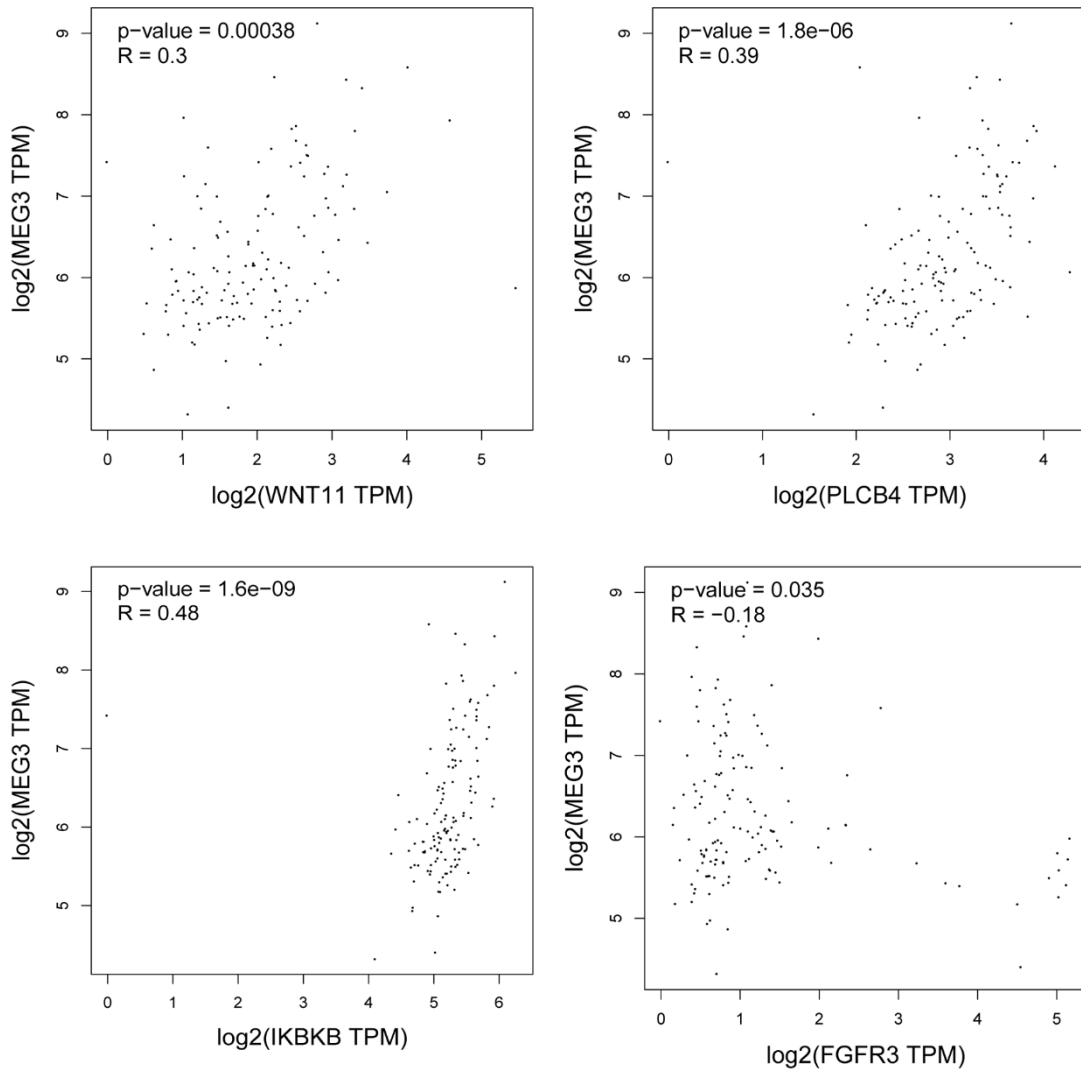

**Supplement 3** The expressed relationship between lncRNA MEG3 and mRNA Wnt11, PLCB4, IKBKB and FGFR3 was analysis using the TCGA database.

**Supplement 4** Demographic and clinical characteristics of colorectal cancer patients (n=40) involved in real time PCR.

| Characteristics | patients, n (range) |
|-----------------|---------------------|
| Age             | 64 (41-80)          |
| Sex             |                     |
| F               | 24                  |
| M               | 16                  |
| Stage           |                     |
| I               | 10                  |
| II              | 10                  |
| III             | 10                  |
| IV              | 10                  |
| T stage         |                     |
| T1              | 3                   |
| T2              | 10                  |
| T3              | 8                   |
| T4              | 19                  |
| N stage         |                     |
| N0              | 23                  |
| N1              | 10                  |
| N2              | 7                   |
| M stage         |                     |
| M0              | 30                  |
| M1              | 10                  |
| N               |                     |
| +               | 25                  |
| -               | 15                  |
| V               |                     |
| +               | 12                  |
| -               | 28                  |
| MLH1            |                     |
| +               | 31                  |
| -               | 9                   |
| MSH2            |                     |
| +               | 39                  |
| -               | 1                   |
| MSH6            |                     |
| +               | 40                  |
| -               | 0                   |
| PMS2            |                     |
| +               | 35                  |

**Supplement 5** Primer sequences used in this study.

| Gene name         | Primer sequence                                                   |
|-------------------|-------------------------------------------------------------------|
| MEG3-1-F          | 5' GCTGAAGAAGCTGCGGATGGAA 3'                                      |
| MEG3-1-R          | CCGTGGCTGTGGAGGGATT 3'                                            |
| hsa-miR-324-5p RT | 5' GTCGTATCCAGTGCCTGTCGTGGAGTCGGCAATTGCACTGG<br>ATACGACCACCAAT 3' |
| hsa-miR-324-5p F  | 5' ATATACTCGCATCCCCTAGGGC 3'                                      |
| hsa-miR-324-5p R  | 5' AGTGCGTGTCTGGAGTCG 3'                                          |
| WNT11-F           | 5' TTGACCTGGAGAGAGGGACC 3'                                        |
| WNT11-R           | 5' AGGAGCATCGGAAAAGTTGG 3'                                        |
| FGFR3-F           | 5' GTGCTCAAGACGGCGGGC 3'                                          |
| FGFR3-R           | 5' GCCACGCAGAGTGATGAGAAAA 3'                                      |
| PLCB4-F           | 5' TGAAGGCAAGGAAGGACAGGT 3'                                       |
| PLCB4-R           | 5' CCACTGCAGACACAACTATCCG 3' 1                                    |
| IKBKB-F           | 5' TGGCACAATCAGGAAACAGGT 3'                                       |
| IKBKB-R           | 5' GGGTGGGTCAGCCTTCTCAT 3'                                        |
| GAPDH -F          | 5' AGAAGGCTGGGGCTCATT 3'                                          |
| GAPDH -R          | 5' TGCTAAGCAGTTGGTGGTG 3'                                         |
| U6-F              | 5' CGATACAGAGAAGATTAGCATGGC 3'                                    |
| U6-R              | 5' AACGCTTCACGAATTTGCGT 3' 3'                                     |
